# Supplementary material for: Characterization of transcript enrichment and detection bias in single-nucleus RNA-seq for mapping of distinct human adipocyte lineages
Source: HighWire-hosted journal article supplement (doi:10.1101/gr.275509.121), 2022-01-18
Supplement: Supplemental_Codes.zip [file spot_counting.xlsx]

## Sheet: Sheet1
Date	Image #	Annotation	Annotation_v2	FOV#	Background Level	Number of foci	Max
8042021	15	NA	NA	1
8042021	21	NA	NA	2
8042021	28	NA	NA	3
8042021	25	NA	NA	7
8042021	45	NA	NA	16
8042021	39	NA	NA	4
8042021	1	Target-	Target-	1	60	76
8042021	2	Target-	Target-	2	52	36
8042021	2	Target-	Target-	2	46	141
8042021	6	Target-	Target-	3	3690	58	14047
8042021	8	Target-	Target-	4	4245	73
8042021	10	Target-	Target-	5	3687	123
8042021	10	Target-	Target-	5	5824	41
8042021	18	Target-	Target-	6	6073	30
8042021	18	Target-	Target-	6	6073	31
8042021	18	Target-	Target-	6	6073	60
8042021	20	Target-	Target-	7	5675	51
8042021	29	Target-	Target-	8	6118	98	17508
8042021	31	Target-	Target-	9	4637	80	15483
8042021	34	Target-	Target-	10	4637	160	12388
8042021	38	Target-	Target-	11	6587	68	20045
8042021	38	Target-	Target-	11	5732	127	20045
8042021	48	Target-	Target-	12	6476	195	24022
8042021	48	Target-	Target-	12	4798	194	24022
8042021	49	Target-	Target-	13	7504	35	15460
8042021	49	Target-	Target-	13	5055	95	15460
8012021	1	Target-	Target-	14	54	97
8012021	1	Target-	Target-	14	68	33
8012021	2	Target-	Target-	15	4145	19
8012021	2	Target-	Target-	15	5443	53
8012021	4	Target-	Target-	16	3752	39
8042021	9	Target-	Target-	4	4259	81
8042021	3	Target-/Target+	Target+	1	6914	230
8042021	3	Target-/Target+	Target-	1	6914	35
8042021	4	Target-/Target+	Target+	2	6180	194
8042021	4	Target-/Target+	Target-	2	6180	54
8042021	7	Target-/Target+	Target+	3	6518	98
8042021	7	Target-/Target+	Target-	3	6518	34
8042021	13	Target-/Target+	Target+	4	4259	323
8042021	13	Target-/Target+	Target-	4	4259	5
8042021	16	Target-/Target+	Target+	5	6177	207
8042021	16	Target-/Target+	Target-	5	6177	67
8042021	26	Target-/Target+	Target+	6	6317	151	19966
8042021	26	Target-/Target+	Target-	6	6317	45	19966
8042021	32	Target-/Target+	Target+	7	10444	208	33751
8042021	32	Target-/Target+	Target-	7	10444	14	33751
8042021	33	Target-/Target+	Target+	8	4384	238	19599
8042021	33	Target-/Target+	Target-	8	4384	27	19599
8042021	35	Target-/Target+	Target+	9	6056	226	19198
8042021	35	Target-/Target+	Target-	9	6056	9	19198
8042021	36	Target-/Target+	Target+	10	6924	215	23018
8042021	36	Target-/Target+	Target-	10	6924	63	23018
8042021	40	Target-/Target+	Target+	11	5513	321	18329
8042021	40	Target-/Target+	Target-	11			18329
8042021	43	Target-/Target+	Target+	12	12422	158	27538
8042021	43	Target-/Target+	Target-	12	12422	0	27538
8042021	44	Target-/Target+	Target+	13	5143	326	26567
8042021	44	Target-/Target+	Target-	13	5143	0	26567
8042021	46	Target-/Target+	NA	14	NA	NA	NA
8042021	47	Target-/Target+	NA	15	NA	NA	NA
8012021	3	Target-/Target+	Target+	16	8632	143
8012021	3	Target-/Target+	Target-	16	8632	3									3684
8012021	5	Target-/Target+	Target+	17	4617	139
8012021	5	Target-/Target+	Target+	17	4617	80
8042021	12	Target-/Target+	Target+	18	3732	536
8042021	12	Target-/Target+	Target-	18	3732	3
8042021	14	Target-/Target+	Target+	19	6589	363
8042021	14	Target-/Target+	Target-	19	6589	1
8042021	5	Target+	Target+	1	7814	189
8042021	11	Target+	Target+	2	4854	137
8042021	17	Target+	Target+	5	5588	302
8042021	17	Target+	Target+	5	6983	141
8042021	19	Target+	Target+	6	3684	271
8042021	19	Target+	Target+	6	3831	217
8042021	22	Target+	Target+	7	4836	439	16619
8042021	23	Target+	Target+	8	11810	370	50020
8042021	24	Target+	Target+	9	5469	248	46217
8042021	24	Target+	Target+	9	8922	288	46217
8042021	27	Target+	Target+	10	6876	510	32090
8042021	30	Target+	Target+	11	8213	374	48248
8042021	41	Target+	Target+	12	7740	483	39457
8042021	42	Target+	Target+	13	6261	294	38236
8042021	42	Target+	Target+	13	8417	165	44669
8042021	50	Target+	Target+	14	9278	139	42997
8042021	51	Target+	Target+	15	6468	375	30809

## Sheet: Sheet2
Date	Image #	FOV#	Background	Number of foci	Number of foci - 15
8162021	75	1	20419	4
	75	2	16844	49
	74	1	25755	69
	73	1	17789	20
	72		13668	51
	71		15402	49
			20569	94
	70	1	12654	1
	70	2	12654	11
	69		19023	10
	68		17038	14
	67		12857	52
	65		NA	NA
	64	1	12857	10
	64	2		0
	64	3		0
	63	1		0
	63	2	15173	6
	62	1		1
	61	1		0
	60	1	17457	8
	59	1	17398	4
	59	2	15011	7
	58	1	15584	93
	57	1	15363	6
	56	1	17103	71
	55	1	16873	0
	55	2	16873	7
	54	1	17028	18
	53	1	16548	16
	52	1	17414	13
	51	1	16427	56
	50	1	20005	50
	49	1	21799	33
	48	1	20784	20
	47	1	39586	5
	46	1	24245	9
	45	1	23499	33
			24283	7
			26639	8	39268
			25302	56
			17823	47
			14256	7

## Sheet: Sheet3
Date	Image #	FOV#	Background	Number of foci - 15
	1	1	12385	42
	1	1	13619	23
	2	1	8965	40
	3	1	10824	15
	4	1	21599	1
	4	1	NA	0
	5	1	12045	24
	6	1	13098	6
	7	1	15195	16
	8	1	16617	1
	9	1	12755	8
	10	1	12628	28
	11	1	NA	0
	12	1	14683	5
	14	1	11179	22
	15	1	14123	41
	16	1	14682	46
	16	2	10920	49
	17	1	16458	17
	17	2	NA	0
	18	1	16219	6
	20	1	16037	61
	21	1	NA	1
	21	2	15451	26
	22	1	12379	65
	23	1	16630	13
	24		15241	65
	26	1	14117	23
	27	1	13567	16
	29	1	NA	0
	29	2	NA	1
	29	3	13567	11
	30	1	NA	1
	31	1	12465	4
	31	2	13413	10
	32	1	14464	17
	34	1	16203	10
	36	1	16479	24
	37	1	NA	2
	38	1	19026	33
	40	1	17247	4
	41	1	17823	21
	42	1	22400	23
	43	1	26873	4
	44	1	19904	19
	45	1	25071	18
	46	1	25752	4
	48	1	19202	22
	49	1	17028	31
	50	1	19218	43
	51	1	16100	34
	52	1	15690	21
	53	1	17124	13
	54	1	15835	14
	55	1	NA	0
	55	1	16873	5
	56	1	14357	115
	57	1	14256	7
	58	1	13823	126
	59	1	17260	5
	59	2	15011	7
	60	1	17243	8
	61	1	NA	0
	62	1	NA	1
	63	1	NA	0
	63	2	13762	8
	64	1	10157	12
	64	2	NA	0
	68	1	15627	12
	67	1	13924	32
	69	1	19023	9
	70	1	NA	1
	70	2	13450	6
	71	1	20569	57
	72	1	16280	32
	73	1	15064	36
	73	1	13994	33
	74	1	27763	25
	75	1	19977	2
	75	2	17053	28
