# Supplementary material for: Characterization of transcript enrichment and detection bias in single-nucleus RNA-seq for mapping of distinct human adipocyte lineages
Source: HighWire-hosted journal article supplement (doi:10.1101/gr.275509.121), 2022-01-18
Supplement: Supplemental_Table_S2.xlsx [file Supplemental_Table_S2.xlsx]

## Sheet: Table S2
Analysis of white and brown preadipocyte snRNA-seq dataset
(A) Differential expression of genes in white and brown nuclei (white vs brown test, logFC > 0 means enrichment in white nuclei)
Gene	p_val	avg_logFC	pct.1	pct.2	p_val_adj
PAX3	0	0.924248	0.664	0.002	0
PDGFRA	1.01188e-222	0.422908	0.689	0.436	2.5798e-218
TCF21	2.14553e-23	0.0579041	0.095	0.044	5.47002e-19
NTNG1	0	2.67543	0.984	0.162	0
LAMA4	0	1.55836	0.859	0.046	0
HIP1	0	1.34673	0.961	0.458	0
BAALC	0	1.1821	0.683	0.023	0
HAS2	0	1.1634	0.917	0.582	0
RPL39L	2.06665e-193	0.206714	0.19	0.003	5.26892e-189
PGF	5.30185e-81	0.111189	0.099	0.008	1.35171e-76
CNN1	7.75936e-45	-0.0643027	0.023	0.08	1.97825e-40
MYH11	3.26024e-62	-0.123777	0.073	0.173	8.31198e-58
MYL9	0	-0.512848	0.83	0.948	0
TAGLN	0	-1.18313	0.334	0.945	0
RGS4	5.30185e-81	-0.91587	0.074	0.741	0
ITGBL1	5.30185e-81	-1.14998	0.907	0.994	0
LYPD1	5.30185e-81	-1.15477	0.055	0.751	0
LIMCH1	5.30185e-81	-1.72005	0.185	0.933	0
CDH13	5.30185e-81	-1.90927	0.73	0.997	0
COL4A2	5.30185e-81	-2.20876	0.386	0.996	0
CTGF	0	-1.30166	0.765	0.999	0
ANKRD1	0	-2.53337	0.081	0.943	0
(B) DE genes between brown cluster 1 and cluster 2 in snRNA-seq dataset (logFC > 0 means enrichment in brown cluster 1)
Gene	p_val	avg_logFC	pct.1	pct.2	p_val_adj
ITGB8	1.17646e-218	1.37068	0.83	0.489	2.99939e-214
DLGAP1	1.64167e-266	1.21018	0.899	0.479	4.18544e-262
NRXN3	8.65069e-281	1.16025	0.963	0.657	2.20549e-276
KRT18	3.33256e-07	0.0091748	0.718	0.611	0.00849635
SBSPON	5.56969e-104	0.420562	0.792	0.464	1.41999e-99
LUZP2	4.77416e-258	1.12955	0.871	0.379	1.21717e-253
MAP3K7CL	2.50682e-57	0.263894	0.492	0.235	6.39115e-53
PRUNE2	1.80939e-296	1.06678	0.901	0.406	4.61304e-292
EPHA5	3.79022e-246	1.03323	0.899	0.444	9.66318e-242
PTPRQ	1.91925e-215	0.999587	0.867	0.477	4.89313e-211
ZFHX4-AS1	1.59687e-278	0.988861	0.976	0.694	4.07123e-274
CNTNAP3B	0	0.969114	0.964	0.692	0
RGS7BP	2.65147e-213	0.948201	0.635	0.122	6.75994e-209
NHS	1.88667e-262	0.947195	0.942	0.684	4.81005e-258
PLCL1	8.56835e-167	0.941265	0.894	0.633	2.1845e-162
ANOS1	8.91987e-294	0.890446	0.749	0.148	2.27412e-289
PCA3	1.11161e-251	0.87893	0.736	0.177	2.83406e-247
CEMIP	1.82344e-148	0.837174	0.988	0.947	4.64886e-144
AC008056.1	1.0052e-177	0.836619	0.712	0.255	2.56275e-173
CAMK1D	2.97638e-210	0.814263	0.932	0.724	7.58827e-206
AC019068.1	6.62126e-170	0.81234	0.499	0.072	1.68809e-165
EMB	1.49582e-284	0.807807	0.778	0.19	3.8136e-280
RELN	9.92248e-111	0.779268	0.882	0.69	2.52974e-106
PID1	1.06955e-156	0.766452	0.787	0.435	2.72681e-152
LINC00882	9.04355e-211	0.766122	0.868	0.451	2.30565e-206
TLE4	3.71291e-148	0.741799	0.958	0.869	9.46607e-144
UBASH3B	3.9809e-239	0.73762	0.991	0.894	1.01493e-234
ZNF704	1.14096e-166	0.730258	0.714	0.26	2.90887e-162
SEMA3C	1.11696e-167	0.722752	0.987	0.917	2.8477e-163
SIM2	6.96025e-133	0.71953	0.423	0.061	1.77452e-128
ADAMTS16	5.65342e-212	0.717103	0.832	0.341	1.44134e-207
ANKRD1	3.51153e-105	0.713754	0.973	0.888	8.95264e-101
PRKCA-AS1	3.78183e-188	0.711917	0.985	0.847	9.64178e-184
DNAH11	2.39958e-160	0.700262	0.837	0.468	6.11773e-156
BICC1	3.95298e-254	0.682814	0.998	0.974	1.00781e-249
2020-03-03	6.48617e-241	0.679943	0.997	0.958	1.65365e-236
ROR1	1.42731e-194	0.671937	0.996	0.976	3.63893e-190
ARHGAP18	1.88344e-199	0.658276	0.992	0.917	4.80183e-195
MCC	5.74232e-91	0.648194	0.855	0.688	1.46401e-86
COL4A5	1.77213e-89	0.64351	0.56	0.239	4.51803e-85
PDE1C	1.44729e-139	0.640236	0.699	0.292	3.68987e-135
KIRREL3	3.88981e-131	0.628921	0.957	0.917	9.91707e-127
AC027097.2	1.51092e-134	0.628066	0.943	0.76	3.85209e-130
NFIB	1.75628e-170	0.622914	0.895	0.538	4.47764e-166
ASB18	4.47604e-140	0.612323	0.4	0.036	1.14117e-135
DOPEY1	3.47159e-144	0.609844	0.914	0.679	8.85081e-140
AC079465.1	3.27354e-94	0.600816	0.6	0.281	8.34589e-90
HIF1A-AS2	3.38573e-158	0.597279	0.992	0.95	8.63191e-154
PTCSC3	4.00917e-118	0.585973	0.465	0.11	1.02214e-113
STAC	2.94092e-143	0.582548	0.946	0.784	7.49787e-139
PALLD	1.3645e-167	0.581343	1	0.98	3.4788e-163
PSG4	4.82429e-158	0.573659	0.995	0.947	1.22995e-153
AC027288.3	6.85191e-126	0.573576	0.759	0.371	1.74689e-121
MID1	3.35404e-116	0.573349	0.931	0.876	8.55113e-112
KCNMA1	2.51582e-137	0.57265	0.905	0.762	6.41409e-133
RBMS3-AS2	2.79138e-125	0.56454	0.928	0.748	7.11663e-121
AC243964.2	1.86336e-141	0.562533	0.915	0.636	4.75063e-137
NALCN	1.73894e-120	0.559165	0.599	0.227	4.43344e-116
ATP8B1	5.64314e-141	0.558659	0.997	0.983	1.43872e-136
CACNG8	1.43668e-102	0.557248	0.561	0.228	3.6628e-98
MBNL2	1.19832e-188	0.552191	0.997	0.958	3.05511e-184
PRKCA	9.30935e-181	0.55123	1	0.997	2.37342e-176
ZFPM2	5.64832e-174	0.549894	0.997	0.976	1.44004e-169
KSR1	2.53141e-158	0.544893	0.599	0.156	6.45383e-154
HMCN1	1.11762e-89	0.542569	0.858	0.585	2.84937e-85
PRICKLE1	7.25474e-51	0.541488	0.544	0.347	1.8496e-46
CCBE1	1.01432e-141	0.539454	0.998	0.991	2.586e-137
AC107021.1	5.72015e-143	0.538724	0.826	0.423	1.45835e-138
CACHD1	5.14253e-130	0.535726	0.768	0.38	1.31109e-125
AL078459.1	8.1814e-93	0.523497	0.961	0.822	2.08585e-88
AC019197.1	4.47657e-127	0.523133	0.728	0.349	1.1413e-122
EDIL3	2.18031e-180	0.522576	0.999	0.985	5.5587e-176
EYA2	9.21762e-120	0.52209	0.652	0.282	2.35003e-115
AL356124.1	7.88746e-120	0.51977	0.628	0.259	2.01091e-115
IL1RAPL1	6.81945e-74	0.514655	0.732	0.447	1.73862e-69
LINC00609	7.91651e-98	0.51441	0.393	0.087	2.01831e-93
ADARB1	6.64071e-112	0.510582	0.698	0.329	1.69305e-107
AC091906.1	5.88212e-132	0.509778	0.607	0.207	1.49965e-127
SAMD12	1.09357e-118	0.503202	0.879	0.55	2.78807e-114
DMD	1.79588e-125	0.503012	0.687	0.303	4.57859e-121
MDGA1	7.86909e-111	0.501768	0.702	0.342	2.00622e-106
ABCC4	6.77606e-147	0.500832	0.962	0.845	1.72756e-142
SEMA5A	9.65305e-232	0.798597	0.993	0.883	2.46105e-227
FST	4.42051e-80	0.581879	0.993	0.98	1.12701e-75
MEST	2.34214e-134	0.534782	0.97	0.827	5.97129e-130
TGFB2	3.49362e-100	0.500358	0.792	0.472	8.90699e-96
BMP4	3.72786e-33	0.164994	0.276	0.115	9.50419e-29
ECM1	6.44416e-22	-0.210265	0.293	0.409	1.64294e-17
ACAN	4.58181e-44	-0.405162	0.053	0.183	1.16813e-39
COL6A2	8.24883e-122	-0.451728	0.996	0.999	2.10304e-117
MFAP5	6.04463e-82	-0.479299	0.835	0.899	1.54108e-77
FBN1	0.0210727	-0.128255	0.997	0.996	1
PI16	5.53643e-36	-0.447613	0.067	0.188	1.41151e-31
MFAP5	6.04463e-82	-0.479299	0.835	0.899	1.54108e-77
IGFBP6	1.96767e-117	-0.490714	0.913	0.945	5.01657e-113
AHNAK		-0.504162			3.99234e-147
MALAT1	3.82154e-100	-0.506347	1	1	9.74302e-96
COL6A1	3.4188e-141	-0.513322	0.961	0.98	8.71623e-137
CD109	4.56016e-113	-0.513992	0.599	0.837	1.16261e-108
CHST11	5.98083e-73	-0.51872	0.42	0.684	1.52481e-68
INPP4B	1.73008e-68	-0.540599	0.558	0.787	4.41084e-64
LMNA	1.61254e-201	-0.541901	0.999	0.999	4.11117e-197
DCLK1	3.51621e-77	-0.545881	0.18	0.431	8.96458e-73
HS3ST3A1	2.98443e-85	-0.546948	0.163	0.421	7.6088e-81
VASN	1.59043e-120	-0.552135	0.779	0.876	4.0548e-116
TNXB	4.80507e-73	-0.571965	0.263	0.496	1.22505e-68
TFPI2	2.55089e-81	-0.605523	0.597	0.742	6.50349e-77
MMP2	5.37411e-166	-0.60721	0.86	0.96	1.37013e-161
PODXL	5.19735e-52	-0.607262	0.445	0.594	1.32507e-47
GREM1	7.39799e-118	-0.616484	0.868	0.972	1.88612e-113
CCND1	3.04177e-150	-0.642585	0.945	0.974	7.755e-146
PBX1	9.50834e-64	-0.644752	0.398	0.624	2.42415e-59
PAMR1	5.82276e-124	-0.650292	0.492	0.823	1.48451e-119
COLEC12	4.04647e-114	-0.653931	0.353	0.682	1.03165e-109
S100A4	4.32127e-193	-0.666221	0.789	0.92	1.10171e-188
SERPINE2	1.58227e-159	-0.670778	0.997	0.999	4.034e-155
MOXD1	1.14138e-42	-0.682002	0.478	0.576	2.90994e-38
CTSK	1.01266e-42	-0.243097	0.134	0.298	2.58179e-38
BST2	1.32677e-31	-0.204378	0.136	0.274	3.38261e-27
PLAT	1.06073e-51	-0.682851	0.331	0.505	2.70433e-47
NEAT1	1.34172e-120	-0.685272	0.999	1	3.42071e-116
SYT1	2.83957e-166	-0.715156	0.328	0.744	7.23947e-162
LINC01592	7.01886e-50	-0.756244	0.173	0.352	1.78946e-45
C16orf45	9.6678e-144	-0.770874	0.731	0.895	2.46481e-139
RFX8	5.19596e-111	-0.787945	0.643	0.85	1.32471e-106
MMP1	2.21493e-129	-0.791578	0.991	0.997	5.64696e-125
SULF1	4.53431e-28	-0.894505	0.411	0.52	1.15602e-23
ABI3BP	8.19292e-72	-0.961125	0.355	0.554	2.08879e-67
XYLT1	0	-1.38842	0.32	0.847	0
